# Supplementary material
Source: bioRxiv or medRxiv preprint supplement (https://www.biorxiv.org/highwire/filestream/34943/field_highwire_adjunct_files/4/119420-13.pdf)

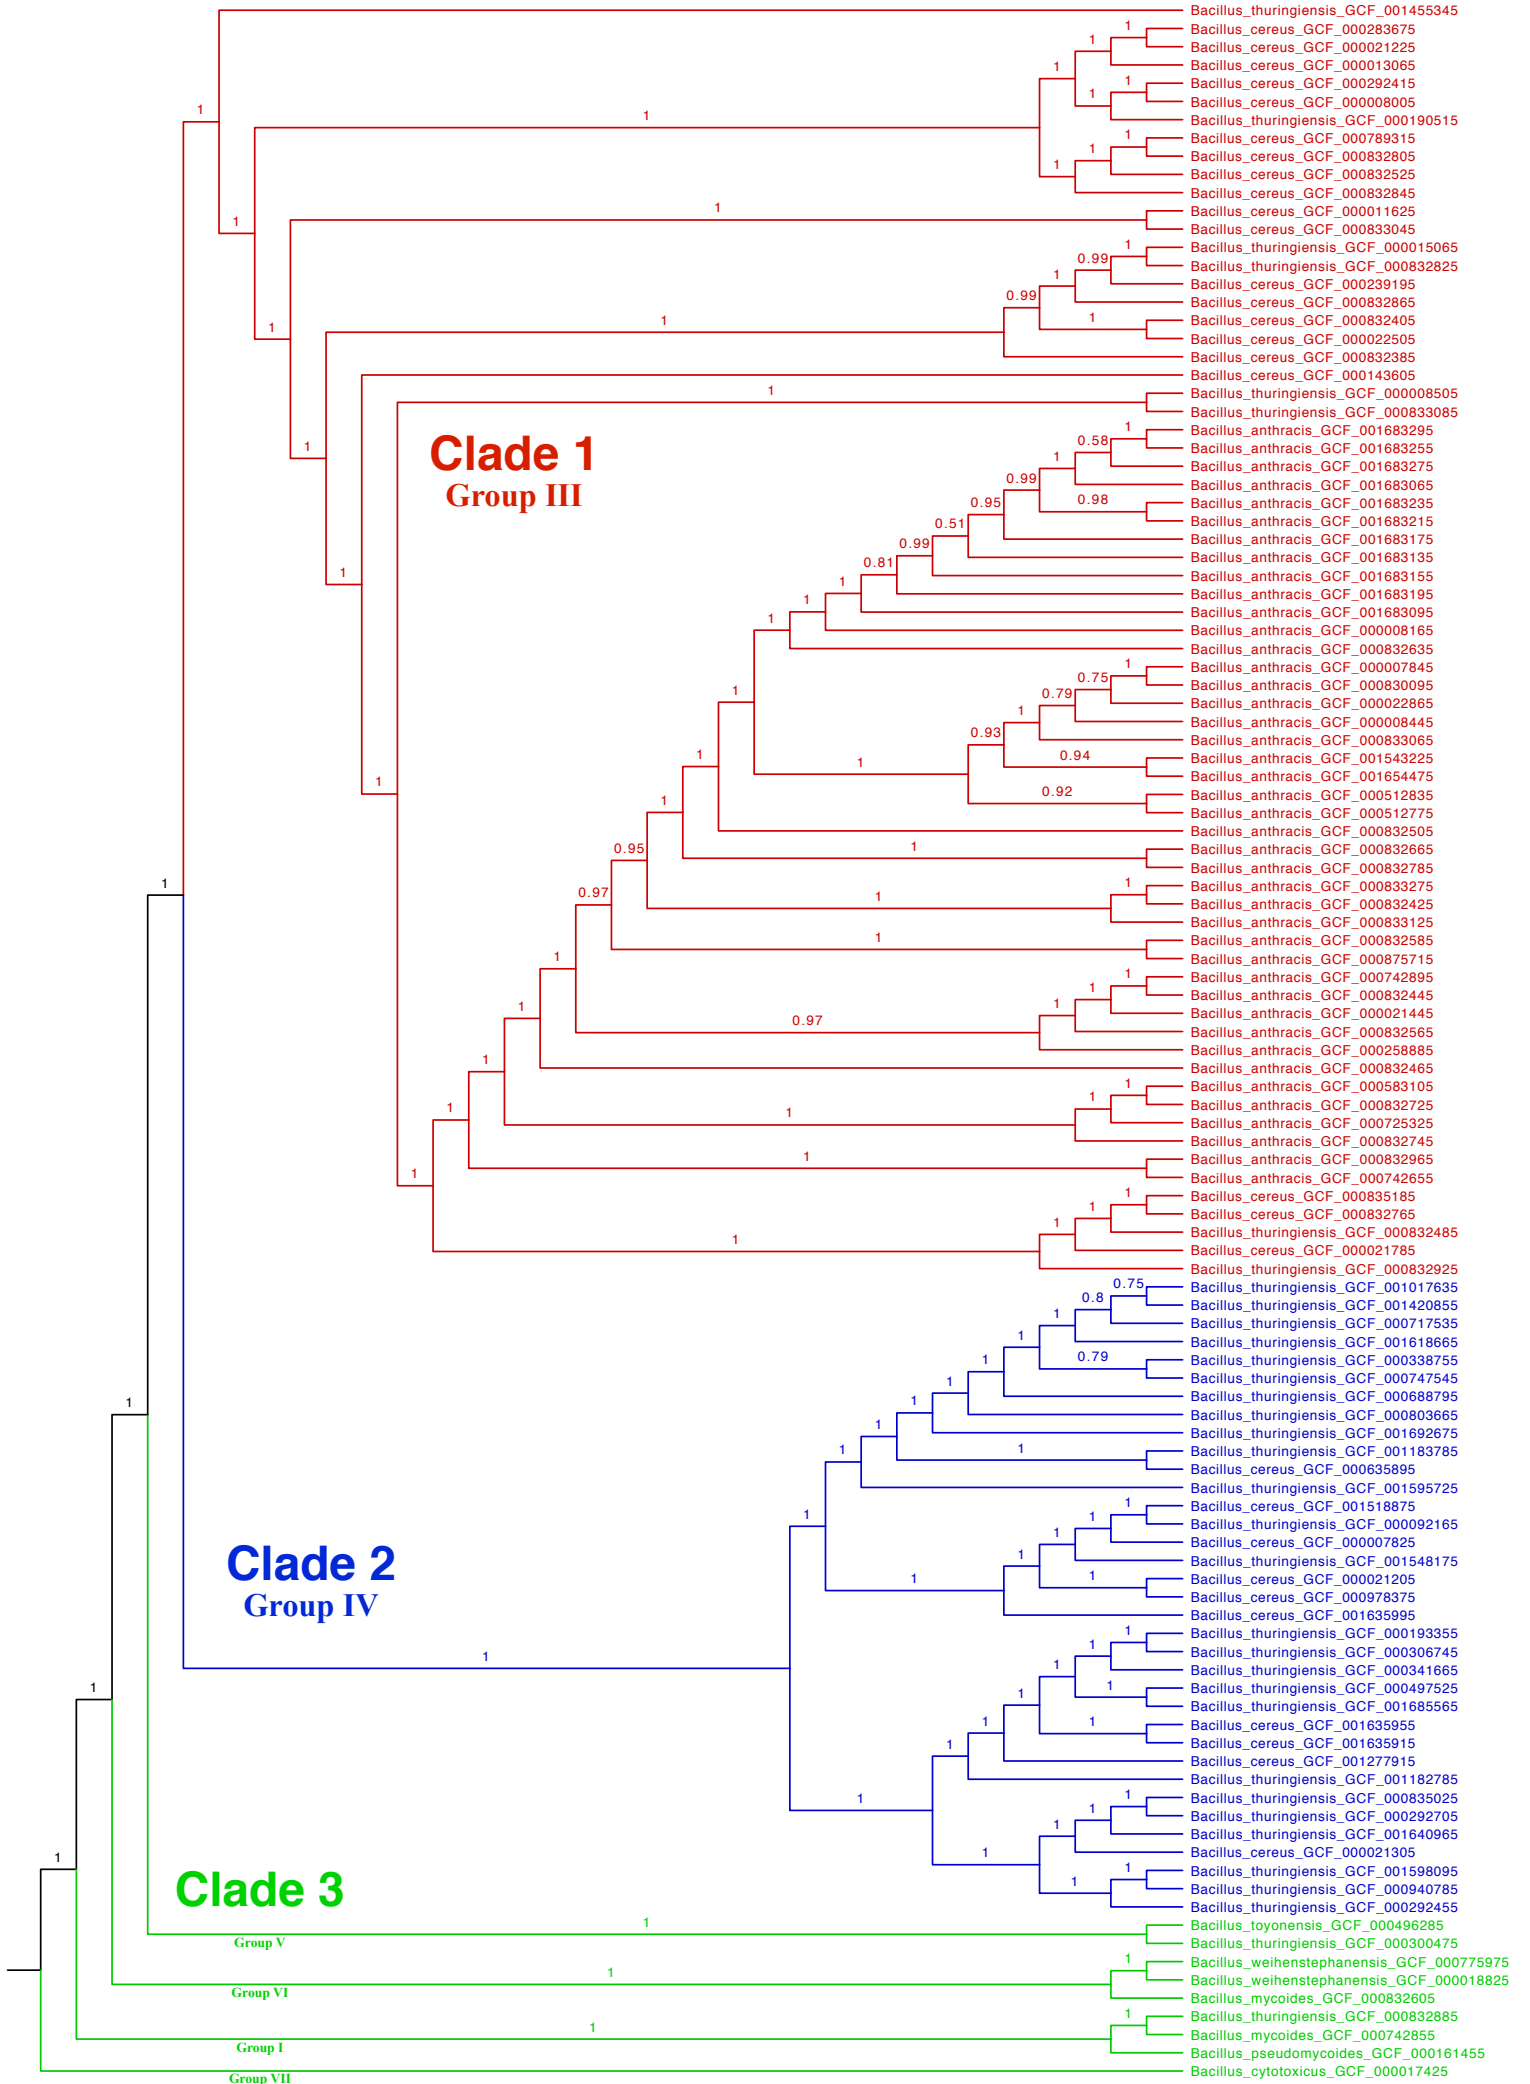

Supplement: Supplementary file [file 119420-13.pdf]
